# Supplementary material for: N-type thermoelectric Ag8SnSe6 with extremely low lattice thermal conductivity by replacing Ag with Cu
Source: Royal Society of Chemistry journal article supplement (doi:10.1039/d0ra10454j), 2021-01-01
Supplement: d0ra10454j1.pdf [file d0ra10454j1.pdf]

## N-type thermoelectric $\text{Ag}_8\text{SnSe}_6$ with extremely low lattice thermal conductivity by replacing Ag with Cu

Chao Yang,<sup>ab</sup> Yong Luo,<sup>\*a</sup> Xie Li,<sup>b</sup> Jiaolin Cui<sup>\*b</sup>

<sup>a</sup> School of Chemical Engineering & Technology, China University of Mining and Technology, Xuzhou, 221116, China

<sup>b</sup> School of Material & Chemical Engineering, Ningbo University of Technology, Ningbo, 315016, China

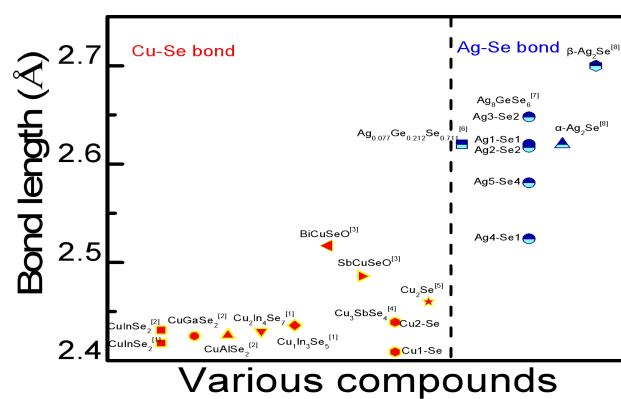

Figure S1. The bond length of Ag-Se and Cu-Se for various compounds.

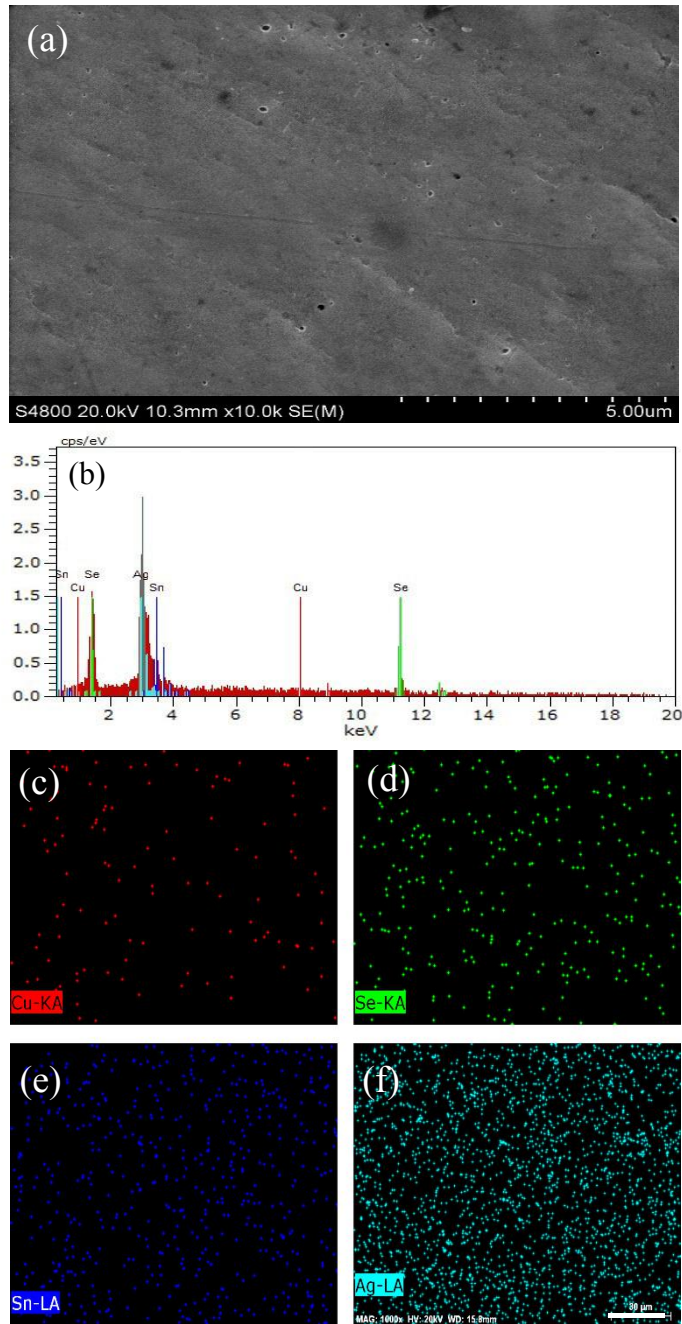

Figure S2. (a) SEM image of the freshly fractured surface of the sample at  $x=0.05$ ; (b) EDS patterns with  $x=0.05$  (c-f) EDS mappings of the elements for the bulk sample in  $\text{Ag}_{8-x}\text{Cu}_x\text{SnSe}_6$  ( $x=0.05$ ).

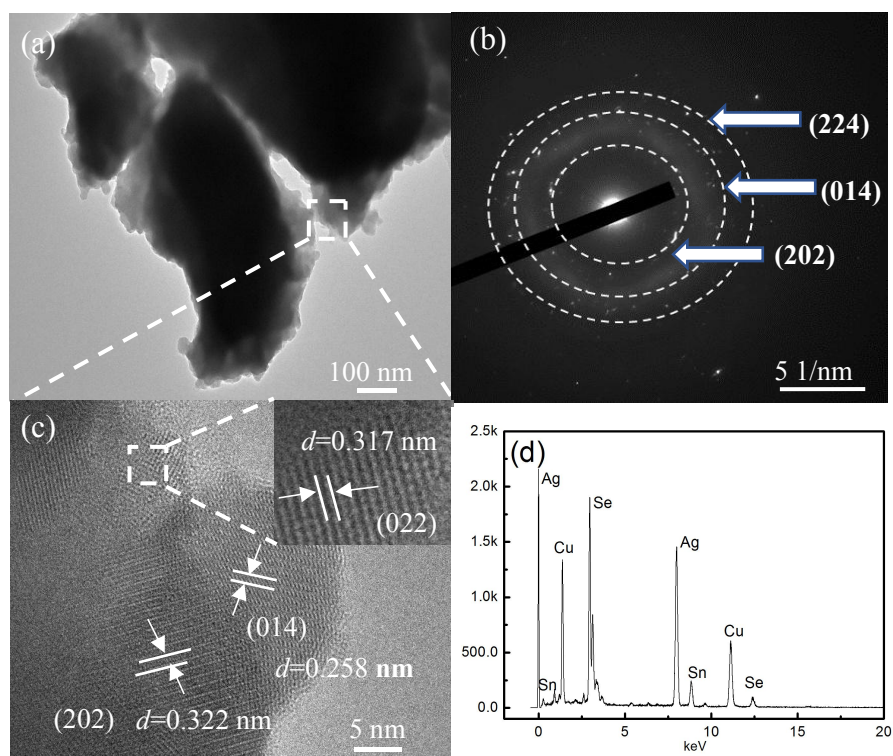

Figure S3. High resolution transmission electron microscopy (HRTEM) image observed in  $\text{Ag}_{7.95}\text{Cu}_{0.05}\text{SnSe}_6$ . (a) TEM image; (b) Selected area electron diffraction (SAED) pattern; (c) The corresponding high resolution TEM image. An inset is the magnified high resolution TEM image; (d) EDAX result.

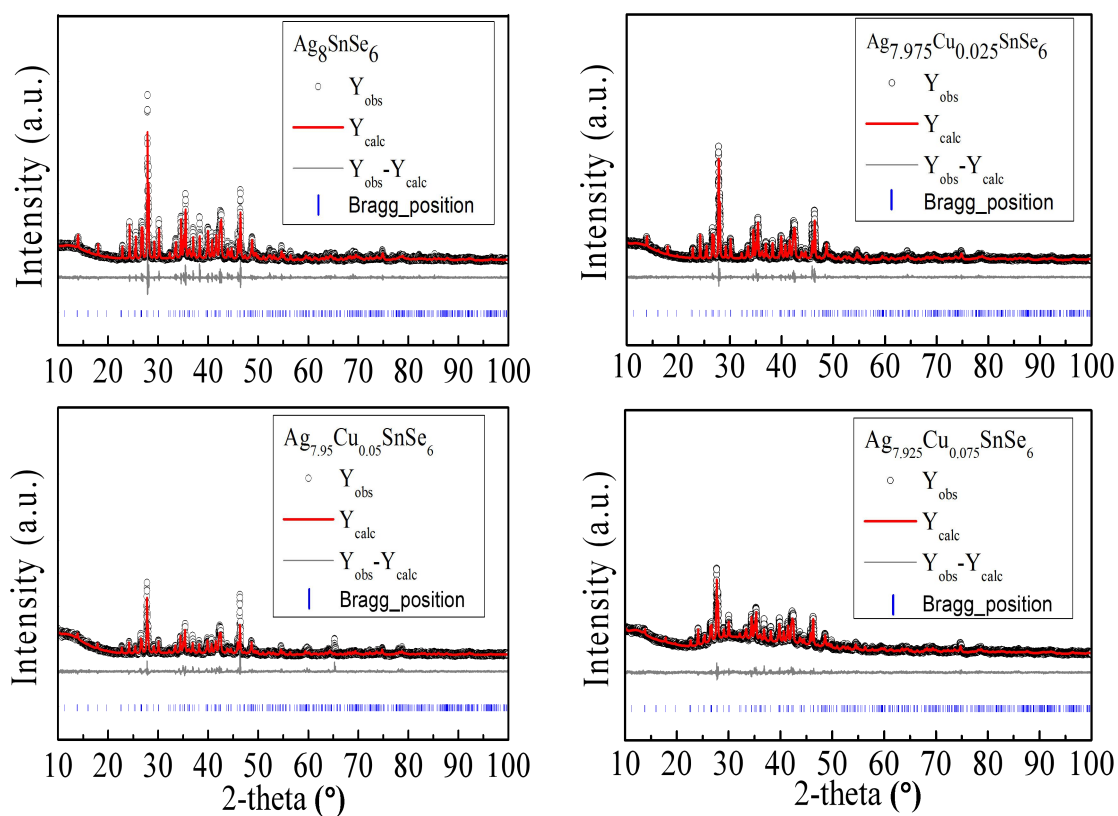

Figure S4. Rietveld refinement using the X-ray diffraction data for the samples  $\text{Ag}_{8-x}\text{Cu}_x\text{SnSe}_6$  ( $x=0, 0.025, 0.05$  and  $0.075$ ).

Table S1. Experimental Parameters of Power X-ray Diffraction, and Refined Crystallographic Data of  $\text{Ag}_{8-x}\text{Cu}_x\text{SnSe}_6$  ( $x=0, 0.025, 0.05$  and  $0.075$ ).

| <b>Chemical Formula</b> | <b><math>\text{Ag}_8\text{SnSe}_6</math><br/>(<math>x = 0</math>)</b> | <b><math>\text{Ag}_{7.975}\text{Cu}_{0.025}\text{SnSe}_6</math><br/>(<math>x = 0.025</math>)</b> | <b><math>\text{Ag}_{7.95}\text{Cu}_{0.05}\text{SnSe}_6</math><br/>(<math>x = 0.05</math>)</b> | <b><math>\text{Ag}_{7.925}\text{Cu}_{0.075}\text{SnSe}_6</math><br/>(<math>x = 0.075</math>)</b> |
|-------------------------|-----------------------------------------------------------------------|--------------------------------------------------------------------------------------------------|-----------------------------------------------------------------------------------------------|--------------------------------------------------------------------------------------------------|
| $a$ (Å)                 | 7.9180 (6)                                                            | 7.9160 (6)                                                                                       | 7.9151 (10)                                                                                   | 7.9164 (5)                                                                                       |
| $b$ (Å)                 | 7.8243 (6)                                                            | 7.8226 (6)                                                                                       | 7.8247 (10)                                                                                   | 7.8225 (5)                                                                                       |
| $c$ (Å)                 | 11.0505 (8)                                                           | 11.0463 (8)                                                                                      | 11.0462 (14)                                                                                  | 11.0448 (6)                                                                                      |
| $V$ (Å <sup>3</sup> )   | 684.61 (8)                                                            | 684.03 (8)                                                                                       | 648.12 (15)                                                                                   | 683.96 (7)                                                                                       |
| $^a R_B$ (%)            | 2.565                                                                 | 6.6                                                                                              | 2.565                                                                                         | 2.565                                                                                            |
| $^b R_p$ (%)            | 6.87                                                                  | 6.35                                                                                             | 7.11                                                                                          | 4.52                                                                                             |
| $^c R_{wp}$ (%)         | 9.26                                                                  | 8.80                                                                                             | 9.94                                                                                          | 5.8                                                                                              |
| $^d S$                  | 1.09                                                                  | 1.09                                                                                             | 1.09                                                                                          | 1.09                                                                                             |

## References

- [1] J. M. Merino, S. Diaz-Moreno, G. Subias and M. Leon, *Thin Solid Films*, 2005, 480, 295.
- [2] T. Maeda and T. Wada, *Phys. Status Solidi C*, 2009, 5, 6.
- [3] B. Feng, G. Li, Y. Hou, C. Zhang, C. Jiang, J. Hu, Q. X, Y. Li, Z. He and X. Fan, *J. Alloys Compd.*, 2017, 04, 121.
- [4] C. Y. Yang, F. Q. Huang, L. M. Wu and K. Xu, *J. Phys. D: Appl. Phys.*, 2011, 44, 295404.
- [5] K. P. Zhao, A. B. Blichfeld, H. Chen and Q. Song, *Copper alloys*, 2017, 29, 6367.
- [6] A. Zeidler, P. S. Salmon, A. Piarristeguy, A. Pradel and H. E. Fischer, *Z. Phys. Chem.*, 2016, 3, 417.
- [7] X. Shen, C. C. Yang, Y. Liu, G. Wang, H. Tan, Y. H. Tung, G. Wang, X. Lu, J. He and X. Zhou, *ACS Appl. Mater. & Interfaces*, 2019, 11, 2168.
- [8] F. Kirchhoff, J. M. Holender and M. J. Gillan, *Phys. Rev. B*, 1996, 54, 191.
